# Supplementary material for: Analysis of Single Locus Trajectories for Extracting In Vivo Chromatin Tethering Interactions
Source: PubMed Central journal article supplement (PMC4552938; doi:10.1371/journal.pcbi.1004433), 2015-08-28
Supplement: pcbi.1004433.s001.pdf [file pcbi.1004433.s001.pdf]

# Supplementary Information: Analysis of single locus trajectories for extracting in vivo chromatin tethering interactions

Amitai Assaf<sup>1</sup>, Toulouze Mathias<sup>2</sup>, Dubrana Karine<sup>2</sup>, Holcman David<sup>3,4,\*</sup>,  
**1** Institute for Medical Engineering & Science, Massachusetts Institute of Tech-

nology, Cambridge, MA, USA.

**2** Laboratory of genetic instability and nuclear organization, CEA, 92265 Fontenay-aux-Roses, France.

**3** IBENS, Ecole Normale Supérieure, 46 rue d'Ulm 75005 Paris, France.

**4** Mathematical Institute University of Oxford, Oxford OX2 6GG UK.

## Supplementary Information

In this Supplementary Information, we detail the analysis, calculations and results presented in the main text.

## Extracting the strength of a potential well for a Rouse polymer

A Rouse polymer which has one monomer interacting with a infinite potential well, can be described by the energy potential

$$\Phi(\mathbf{R}) = \frac{k}{2} \mathbf{R}_n^2 + \frac{\kappa}{2} \sum_{i=1}^{N-1} (\mathbf{R}_{i+1} - \mathbf{R}_i)^2. \quad (1)$$

where  $\mathbf{R} = (\mathbf{R}_1, \mathbf{R}_2, \dots, \mathbf{R}_N)$  is the collection of the monomers, connected by a spring constant  $\kappa = dk_B T/b^2$ ,  $b$  is the standard-deviation of the distance between adjacent monomers [21],  $k_B$  the Boltzmann coefficient,  $T$  the temperature and  $d$  the dimensionality (dim 2 or 3),  $k$  is the strength of the external harmonic well acting on monomer  $n$ , located at the origin.

To extract the strength of the potential well applied on monomer  $n$  from the measured velocity of locus  $c$  ( $n < c$ ), we will compute

$$\lim_{\Delta t \rightarrow 0} \mathbb{E} \left\{ \frac{\mathbf{R}_c(t + \Delta t) - \mathbf{R}_c(t)}{\Delta t} \middle| \mathbf{R}_c = \mathbf{x} \right\} = -D \int_{\Omega} d\mathbf{R}_1 \dots \int_{\Omega} d\mathbf{R}_N (\nabla_{\mathbf{R}_c} \Phi) P(\mathbf{R} | \mathbf{R}_c = \mathbf{x}). \quad (2)$$

The force acting on monomer  $c$ , when its position is  $\mathbf{x}$  is given by

$$\mathbf{F}_{\mathbf{R}_c=\mathbf{x}}^c = -\nabla_{\mathbf{R}_c} \Phi(\mathbf{R}_{c-1}, \mathbf{R}_c, \mathbf{R}_{c+1})_{\mathbf{R}_c=\mathbf{x}} = -\kappa(\mathbf{x} - \mathbf{R}_{c-1}) - \kappa(\mathbf{x} - \mathbf{R}_{c+1}). \quad (3)$$

The equilibrium probability distribution function is the Boltzmann distribution, conditioned to  $\mathbf{R}_c = \mathbf{x}$ :

$$P(\mathbf{R}|\mathbf{R}_c = \mathbf{x}) = \mathcal{N} e^{-\Phi(\mathbf{R}_1, \dots, \mathbf{R}_{c-1}, \mathbf{x}, \mathbf{R}_{c+1}, \dots, \mathbf{R}_N)}, \quad (4)$$

with the normalization factor

$$\begin{aligned} \mathcal{N}^{-1} &= \int_{\Omega} \dots \int_{\Omega} d\mathbf{R}_1 \dots d\mathbf{R}_{c-1} d\mathbf{R}_{c+1} \dots d\mathbf{R}_N P(\mathbf{R}|\mathbf{R}_c = \mathbf{x}) \\ &= \int \exp[-\kappa \mathbf{x}^2] \exp \left[ -\frac{1}{2} \sum_{p,q=1;p,q \neq c}^N A_{p,q} R_p R_q + \sum_{p=1;p \neq c}^N B_p R_p \right] d\mathbf{R}_1 \dots d\mathbf{R}_{c-1} \dots d\mathbf{R}_N \\ &= \left[ \frac{(2\pi)^{N-1}}{\det A} \right]^{d/2} e^{-\kappa \mathbf{x}^2} e^{\frac{1}{2} \mathbf{B}^T A^{-1} \mathbf{B}}. \end{aligned} \quad (5)$$

The matrix  $A$  is a matrix that can be decomposed into  $d$  blocks  $A^i$ , each of size  $(N-1) \times (N-1)$ .  $A^i$  is also a block matrix of

$$A^i = \begin{pmatrix} A_1^i & 0 \\ 0 & A_2^i \end{pmatrix} \quad (6)$$

with

$$A_1^i = \begin{pmatrix} \kappa & -\kappa & 0 & \cdots & 0 & 0 \\ -\kappa & 2\kappa & -\kappa & \cdots & 0 & 0 \\ \vdots & \vdots & \vdots & \ddots & \vdots & \vdots \\ \vdots & 0 & -\kappa & 2\kappa + k & -\kappa & \vdots \\ \vdots & \vdots & \vdots & \ddots & \vdots & \vdots \\ \vdots & 0 & 0 & -\kappa & 2\kappa & -\kappa \\ \vdots & 0 & 0 & 0 & -\kappa & 2\kappa \end{pmatrix}, \quad (7)$$

which is of size  $(c-1) \times (c-1)$  and

$$A_2^i = \begin{pmatrix} 2\kappa & -\kappa & 0 & \cdots & 0 & 0 \\ -\kappa & 2\kappa & -\kappa & \cdots & 0 & 0 \\ \vdots & \vdots & \vdots & \ddots & \vdots & \vdots \\ \vdots & 0 & 0 & -\kappa & 2\kappa & -\kappa \\ \vdots & 0 & 0 & 0 & -\kappa & \kappa \end{pmatrix}, \quad (8)$$

which is of size  $(N - c) \times (N - c)$ . The vector  $\mathbf{B}$  is composed of  $d$  blocks, each given by

$$B^i = \begin{pmatrix} 0 \\ \vdots \\ \kappa x^i \\ \kappa x^i \\ 0 \\ \vdots \end{pmatrix}. \quad (9)$$

Since  $A^i$  is a tridiagonal matrix, we compute the determinant and its inverse using an algorithm proposed in [34]: first, the determinant of the matrix  $A^i$  is found by solving the recurrence relation

$$\begin{aligned} \theta_l &= b_l \theta_{l-1} - a_l c_{l-1} \theta_{l-2} \quad l \geq 1, \\ \theta_{-1} &= 0, \\ \theta_0 &= 1, \end{aligned} \quad (10)$$

where  $b_j$  are the elements on the diagonal ( $j = 1..N$ ),  $a_j$  are the elements below the diagonal ( $j = 2..N$ ) and  $c_j$  are the elements above the diagonal ( $j = 1..N - 1$ ). For  $l < n$  the recurrence relation is

$$\begin{aligned} \theta_l &= 2\kappa \theta_{l-1} - \kappa^2 \theta_{l-2} \quad \text{for } n > l \geq 2, \\ \theta_0 &= 1, \\ \theta_1 &= \kappa. \end{aligned} \quad (11)$$

The characteristic polynomial of the relation is

$$P(t) = t^2 - 2\kappa t + \kappa^2, \quad (12)$$

which has one double root

$$r = \kappa. \quad (13)$$

Thus, the solution of the recurrence relation (11) is

$$\theta_l = k_1 \kappa^l + k_2 l \kappa^l. \quad (14)$$

Substituting the initial conditions (eq.11), we find

$$\theta_l = \kappa^l \quad \text{for } l < n. \quad (15)$$

We next find the series solution at position  $n$ :

$$\theta_n = (2\kappa + k)\theta_{n-1} - \kappa^2 \theta_{n-2} = \kappa^n + k\kappa^{n-1}, \quad (16)$$

while

$$\theta_{n+1} = 2\kappa \theta_n - \kappa^2 \theta_{n-1} = \kappa^{n+1} + 2k\kappa^n. \quad (17)$$

We solve again the recurrence relation

$$\begin{aligned}\theta_l &= 2\kappa\theta_{l-1} - \kappa^2\theta_{l-2} \text{ for } l > n+1, \\ \theta_n &= \kappa^n + k\kappa^{n-1}, \\ \theta_{n+1} &= \kappa^{n+1} + 2k\kappa^n.\end{aligned}\tag{18}$$

Eq.(18) has the same characteristic polynomial (eq.12), thus

$$\theta_l = k_1\kappa^l + k_2l\kappa^l\tag{19}$$

and with the new initial conditions (eq.18), we find

$$\theta_l = \kappa^{n-1} (\kappa^{l-n+1} + (l-n+1)k\kappa^{l-n}), \text{ for } n \leq l \leq c-1.\tag{20}$$

Thus, since  $\det A_1^i = \theta_{c-1}$  [34]:

$$\det A_1^i = \kappa^{n-1} (\kappa^{c-n-1+1} + (c-1-n+1)k\kappa^{c-1-n}) = (\kappa^{c-1} + (c-n)k\kappa^{c-2})\tag{21}$$

and using eq.(15) we find

$$\det A_2^i = \kappa^{N-c}.\tag{22}$$

The term in the exponential in eq.(5) is given by

$$(B^i)^T [A^i]^{-1} B^i = (\kappa x^i)^2 ((A_1^i)_{c-1, c-1}^{-1} + (A_2^i)_{1,1}^{-1}).\tag{23}$$

Since  $A_1^i$  is a tridiagonal matrix [34]

$$(A_1^i)_{c-1, c-1}^{-1} = \frac{\theta_{c-2}}{\theta_{c-1}} = \frac{\kappa^{-1} (\kappa^{c-1} + (c-n-1)k\kappa^{c-2})}{(\kappa^{c-1} + (c-n)k\kappa^{c-2})} = \frac{\kappa + (c-n-1)k}{\kappa (\kappa + (c-n)k)},\tag{24}$$

while [34]

$$(A_2^i)_{1,1}^{-1} = \frac{1}{\kappa}.\tag{25}$$

Substituting (24) and (25) into (23) we find

$$(B^i)^T [A^i]^{-1} B^i = (\kappa x^i)^2 \left( \frac{\kappa + (c-n-1)k}{\kappa (\kappa + (c-n)k)} + \frac{1}{\kappa} \right) = (\kappa x^i)^2 \left( \frac{2}{\kappa} - \frac{k}{\kappa (\kappa + (c-n)k)} \right).\tag{26}$$

Substituting (26) into (5) we find

$$\begin{aligned}\mathcal{N}^{-1} &= \left[ \frac{(2\pi)^{N-1}}{(\kappa + (c-n)k) \kappa^{N-2}} \right]^{3/2} e^{-\kappa x^2} e^{\frac{1}{2} \mathbf{B}^T A^{-1} \mathbf{B}} \\ &= \left[ \frac{(2\pi)^{N-1}}{(\kappa + (c-n)k) \kappa^{N-2}} \right]^{3/2} e^{-\frac{1}{2} \kappa x^2} e^{-\frac{\mathbf{x}^2 k \kappa}{2 (\kappa + (c-n)k)}}.\end{aligned}\tag{27}$$

We can now we calculate the conditional expectation of the measured velocity of monomer  $c$  (eq.2).

$$\begin{aligned}
& \lim_{\Delta t \rightarrow 0} \mathbb{E} \left\{ \frac{\mathbf{R}_c(t + \Delta t) - \mathbf{R}_c(t)}{\Delta t} \middle| \mathbf{R}_c = \mathbf{x} \right\} = \\
& -\mathcal{N}D e^{-\kappa \mathbf{x}^2} \int (\kappa(\mathbf{x} - \mathbf{R}_{c-1}) - \kappa(\mathbf{R}_{c+1} - \mathbf{x})) e^{-\frac{1}{2} \sum_{i,p,q} A_{p,q}^i R_p R_q + \sum_{i,p} B_p^i R_p^i} \prod_{i \neq c}^N d\mathbf{R}_i = \\
& = -\mathcal{N}D \left[ \frac{(2\pi)^{N-1}}{\det A} \right]^{3/2} e^{-\kappa \mathbf{x}^2} e^{\frac{1}{2} B^T A^{-1} B} \kappa (2\mathbf{x} - (B_{c-1,c-1} (A_1^i)_{c-1,c-1}^{-1} + B_{c,c} (A_2^i)_{1,1}^{-1})) = \\
& = -D\kappa \left( 2\mathbf{x} - \kappa \mathbf{x} \left( \frac{2}{\kappa} - \frac{k}{\kappa(\kappa + (c-n)k)} \right) \right) = -D \frac{k\kappa \mathbf{x}}{\kappa + (c-n)k}. \tag{28}
\end{aligned}$$

Finally

$$\lim_{\Delta t \rightarrow 0} \mathbb{E} \left\{ \frac{\mathbf{R}_c(t + \Delta t) - \mathbf{R}_c(t)}{\Delta t} \middle| \mathbf{R}_c = \mathbf{x} \right\} = -\mathbf{x} D k_{cn}, \tag{29}$$

where

$$k_{cn} = \frac{k\kappa}{\kappa + (c-n)k}. \tag{30}$$

For a Rouse polymer the force depends only on the distance along the chain  $|c - n|$ . Interestingly, the restoring force decays inversely proportional to the distance along the chain.

### 0.1 The variance of monomer $c$ position

We now compute the variance of a monomer position  $\langle \mathbf{R}_c^2 \rangle$  with respect to its average position (mean zero)

$$\begin{aligned}
\langle \mathbf{R}_c^2 \rangle &= \int \dots \int \mathbf{R}_c^2 P(\mathbf{R}) \prod_{i=1}^N d\mathbf{R}_i = \mathcal{N} \int \mathbf{R}_c^2 e^{-\Phi(\mathbf{R})} \prod_{i=1}^N d\mathbf{R}_i \\
&= \mathcal{N} \int \mathbf{R}_c^2 \exp \left[ -\frac{1}{2} \sum_{p,q=1;p,q \neq c}^N G_{p,q} R_p R_q \right] \prod_{i=1}^N d\mathbf{R}_i, \tag{31}
\end{aligned}$$

where the potential  $\Phi$  is given by (1) and  $G$  is a matrix composed of  $d$  blocks ( $G^i$ ), each of size  $N \times N$ :

$$G^i = \begin{pmatrix} \kappa & -\kappa & 0 & \cdots & 0 & 0 \\ -\kappa & 2\kappa & -\kappa & \cdots & 0 & 0 \\ \vdots & \vdots & \vdots & \ddots & \vdots & \vdots \\ \vdots & 0 & -\kappa & 2\kappa + k & -\kappa & \vdots \\ \vdots & \vdots & \vdots & \ddots & \vdots & \vdots \\ \vdots & 0 & 0 & -\kappa & 2\kappa & -\kappa \\ \vdots & 0 & 0 & 0 & -\kappa & \kappa \end{pmatrix}. \quad (32)$$

Thus, rewriting eq.(31)

$$\begin{aligned} \langle \mathbf{R}_c^2 \rangle &= \mathcal{N} \int \mathbf{R}_c^2 \exp \left[ -\frac{1}{2} \sum_{p,q=1;p,q \neq c}^N G_{p,q} R_p R_q \right] \prod_{i=1}^N d\mathbf{R}_i \\ &= \mathcal{N} \left[ \frac{(2\pi)^{d(N-1)}}{\det G} \right]^{1/2} \sum_i (G^i)_{cc}^{-1} = \sum_i (G^i)_{cc}^{-1}, \end{aligned} \quad (33)$$

where [34]

$$(G^i)_{cc}^{-1} = \frac{\theta_{c-1} \phi_{c+1}}{\det G} \quad (34)$$

and

$$\begin{aligned} \phi_l &= b_l \theta_{l+1} - a_{l+1} c_l \theta_{l+2} \quad \text{for } n < l \leq N, \\ \phi_{N+1} &= 1, \\ \phi_{N+2} &= 0. \end{aligned} \quad (35)$$

Since  $c > n$ , solving the recurrence relation 35, we find

$$\phi_l = \kappa^{N-l+1} \quad \text{for } n < l \leq N, \quad (36)$$

Thus, using the value  $\theta_{c-1}$  (eq.20)

$$\begin{aligned} \phi_{c+1} &= \kappa^{N-c} \\ \theta_{c-1} &= \kappa^{n-1} (\kappa^{c-n} + (c-n)k\kappa^{c-n-1}), \end{aligned} \quad (37)$$

while

$$\theta_{N-1} = \kappa^{n-1} (\kappa^{N-n} + (N-n)k\kappa^{N-n-1}) \quad (38)$$

Finally, the determinant is given by

$$\det G = \kappa \theta_{N-1} - \kappa^2 \theta_{N-2} = k \kappa^{N-1} \quad (39)$$

and the inverse element

$$(G^i)_{cc}^{-1} = \frac{\theta_{c-1} \phi_{c+1}}{\det G} = \frac{\kappa + (c-n)k}{k \kappa} \quad (40)$$

Finally, substituting (40) into eq.(33), we find the variance for the position to be

$$\langle \mathbf{R}_c^2 \rangle = \sum_i \frac{\kappa + (c-n)k}{k \kappa} = \frac{d}{k_{cn}}, \quad (41)$$

where we use the definition 30 for  $k_{cn}$ .

## 0.2 Extracting the strength of a potential well for a $\beta$ -polymer

We now derive an expression for the measured velocity of a monomer  $c$  when monomer  $n$  further away along the chain interacts with an harmonic potential well for the  $\beta$ -polymer model [24]. We recall that for the  $\beta$ -model, the polymer potential is given

$$\tilde{\phi}(\mathbf{R}_1, \dots, \mathbf{R}_N) = \frac{1}{2} \sum_{l,m} \mathbf{R}_l \mathbf{R}_m A_{l,m} = \frac{k}{2} \sum_{pq=0}^{N-1} \alpha_p^n \alpha_q^n \mathbf{u}_p \mathbf{u}_q, \quad (42)$$

where

$$A_{l,m} = 4\kappa \frac{2}{N} \sum_{p=0}^{N-1} \sin^\beta \left( \frac{p\pi}{2N} \right) \cos \left( \left( l - \frac{1}{2} \right) \frac{p\pi}{N} \right) \cos \left( \left( m - \frac{1}{2} \right) \frac{p\pi}{N} \right). \quad (43)$$

When a localized interaction acts on monomer  $n$ , the polymer energy becomes

$$\tilde{\phi}(\mathbf{R}_1, \dots, \mathbf{R}_N) = \frac{1}{2} \sum_{l,m} \mathbf{R}_l \mathbf{R}_m A_{l,m} + \frac{1}{2} k \mathbf{R}_n^2, \quad (44)$$

which can be represented as

$$\tilde{\phi}(\mathbf{R}_1, \dots, \mathbf{R}_N) = \frac{1}{2} \sum_{l,m} \mathbf{R}_l \mathbf{R}_m C_{l,m}, \quad (45)$$

where

$$C_{l,m} = \begin{cases} A_{n,n} + k, \\ A_{l,m}, & \text{else.} \end{cases} \quad (46)$$

The probability distribution function is the Boltzmann distribution

$$P(\mathbf{R}) = \mathcal{N} e^{-\tilde{\phi}(\mathbf{R})}, \quad (47)$$

while the conditional probability distribution function is

$$P(\mathbf{R}|\mathbf{R}_c = \mathbf{x}) = \mathcal{N} e^{-\tilde{\phi}(\mathbf{R}_1, \dots, \mathbf{R}_{c-1}, \mathbf{x}, \mathbf{R}_{c+1})}. \quad (48)$$

The normalization factor  $\mathcal{N}$  is given by

$$\begin{aligned} \mathcal{N}^{-1} &= \int P(\mathbf{R}|\mathbf{R}_c = \mathbf{x}) \prod_{k \neq c} d\mathbf{R}_k = \int e^{-\tilde{\phi}(\dots, \mathbf{R}_{c-1}, \mathbf{x}, \mathbf{R}_{c+1}, \dots)} \prod_{k \neq c} d\mathbf{R}_k \\ &= \int e^{-\frac{1}{2} C_{c,c} \mathbf{x}^2} \exp \left[ -\frac{1}{2} \left( \sum_{l,m \neq c} C_{l,m} \mathbf{R}_l \mathbf{R}_m + 2 \sum_{l \neq c} C_{l,c} \mathbf{R}_l \mathbf{x} \right) \right] \\ &= \int e^{-\frac{1}{2} C_{c,c} \mathbf{x}^2} \exp \left[ -\frac{1}{2} \sum_{l,m} \tilde{C}_{l,m} \mathbf{R}_l \mathbf{R}_m + \sum_l F_l \mathbf{R}_l \right] \\ &= \left[ \frac{(2\pi)^{N-1}}{\det \tilde{C}} \right]^{3/2} e^{-\frac{1}{2} B_{c,c} \mathbf{x}^2} e^{\frac{1}{2} \mathbf{F}^T \tilde{C}^{-1} \mathbf{F}}, \end{aligned} \quad (49)$$

The matrix  $\tilde{C}$  is the reduced matrix  $C$  (eq.46) when the row and column  $c$  is removed. It is a block matrix with  $d$  blocks each of size  $(N-1) \times (N-1)$ , where each block  $i$  given by

$$\tilde{C}^i = \begin{pmatrix} A_{1,1} & \cdots & \cdots & \cdots & & \\ \vdots & \vdots & \vdots & \vdots & \vdots & \vdots \\ \vdots & A_{n,n} + k & \vdots & \vdots & \vdots & \vdots \\ \vdots & \vdots & \ddots & \vdots & \vdots & \vdots \\ \vdots & \vdots & A_{c-1,c-1} & A_{c-1,c+1} & A_{c-1,c+2} & \vdots \\ \vdots & \vdots & A_{c+1,c-1} & A_{c+1,c+1} & A_{c+1,c+2} & \vdots \\ \vdots & \vdots & \vdots & \vdots & \vdots & \vdots \end{pmatrix}, \quad (50)$$

and the vector  $\mathbf{F}$  is compose of  $d$  blocks, each of size  $(N-1)$ :

$$F^i = \begin{pmatrix} -A_{1,c} x^i \\ \vdots \\ -A_{c-1,c} x^i \\ -A_{c+1,c} x^i \\ \vdots \\ -A_{N,c} x^i \end{pmatrix}. \quad (51)$$

The force acting on monomer  $c$  is given by

$$-\nabla_{\mathbf{R}_c} \tilde{\phi}(\mathbf{R}_1, \dots, \mathbf{R}_N) = -A_{c,c} \mathbf{R}_c - \sum_{l \neq c} A_{l,c} \mathbf{R}_l. \quad (52)$$



The conditional expectation of the velocity of monomer  $c$  at small time steps is

$$\begin{aligned} \lim_{\Delta t \rightarrow 0} \mathbb{E} \left\{ \frac{\mathbf{R}_c(t + \Delta t) - \mathbf{R}_c(t)}{\Delta t} \middle| \mathbf{R}_c = \mathbf{x} \right\} &= D \int \left[ -\nabla_{\mathbf{R}_c} \tilde{\phi}(\mathbf{R}_1, \dots, \mathbf{R}_N) \right]_{\mathbf{R}_c = \mathbf{x}} \\ P(\mathbf{R} | \mathbf{R}_c = \mathbf{x}) \prod_{i \neq c} d\mathbf{R}_i, \end{aligned} \quad (53)$$

where the conditional force is given by (52) and the conditional probability by (48) and (49). Thus

$$\begin{aligned} \lim_{\Delta t \rightarrow 0} \mathbb{E} \left\{ \frac{\mathbf{R}_c(t + \Delta t) - \mathbf{R}_c(t)}{\Delta t} \middle| \mathbf{R}_c = \mathbf{x} \right\} &= D \int \left[ -\nabla_{\mathbf{R}_c} \tilde{\phi}(\mathbf{R}_{c-1}, \mathbf{R}_c, \mathbf{R}_{c+1}) \right]_{\mathbf{R}_c = \mathbf{x}} \\ P(\mathbf{R}_{c-1}, \mathbf{R}_c, \mathbf{R}_{c+1} | \mathbf{R}_c = \mathbf{x}) \prod_{i \neq c} d\mathbf{R}_i &= \\ -N D e^{-\frac{1}{2} C_{c,c} \mathbf{x}^2} \int (A_{c,c} \mathbf{x} + \sum_{l \neq c} A_{l,c} \mathbf{R}_l) \exp \left[ -\frac{1}{2} \sum_{l,m} \tilde{C}_{l,m} \mathbf{R}_l \mathbf{R}_m + \sum_l \mathbf{F}_l \mathbf{R}_l \right] \prod_{i \neq c} d\mathbf{R}_i &= \\ -A_{c,c} D \mathbf{x} - N D e^{-\frac{1}{2} C_{c,c} \mathbf{x}^2} \int \sum_{l \neq c} A_{l,c} \mathbf{R}_l \exp \left[ -\frac{1}{2} \sum_{l,m} \tilde{C}_{l,m} \mathbf{R}_l \mathbf{R}_m + \sum_l \mathbf{F}_l \mathbf{R}_l \right] \prod_{i \neq c} d\mathbf{R}_i &= \\ -A_{c,c} D \mathbf{x} - N D e^{-\frac{1}{2} C_{c,c} \mathbf{x}^2} \left[ \frac{(2\pi)^{n-1}}{\det \tilde{C}} \right]^{3/2} \sum_{i,l \neq c} A_{l,c} \frac{\partial}{\partial F_l^i} e^{\frac{1}{2} \mathbf{F}^T \tilde{C}^{-1} \mathbf{F}} &= \\ -A_{c,c} D \mathbf{x} - D e^{-\frac{1}{2} \mathbf{F}^T \tilde{C}^{-1} \mathbf{F}} \sum_{i,l \neq c} A_{l,c} \frac{\partial}{\partial F_l^i} e^{\frac{1}{2} \mathbf{F}_l \tilde{C}_{l,m}^{-1} \mathbf{F}_m} &= \\ -A_{c,c} D \mathbf{x} - D \sum_{l \neq c} A_{l,c} \sum_{m \neq c} \tilde{C}_{l,m}^{-1} \mathbf{F}_m = -A_{c,c} D \mathbf{x} - D \sum_{l \neq c} A_{l,c} \sum_{m \neq c} \tilde{C}_{l,m}^{-1} (-A_{m,c} \mathbf{x}) &= \\ -\mathbf{x} D \left( A_{c,c} - \sum_{l,m \neq c} A_{l,c} A_{m,c} \tilde{C}_{l,k}^{-1} \right). \end{aligned} \quad (54)$$

We conclude that

$$\lim_{\Delta t \rightarrow 0} \mathbb{E} \left\{ \frac{\mathbf{R}_c(t + \Delta t) - \mathbf{R}_c(t)}{\Delta t} \middle| \mathbf{R}_c = \mathbf{x} \right\} = -\mathbf{x} D k_{cn}(\beta, N), \quad (55)$$

where

$$k_{cn}(\beta, N) = A_{c,c} - \sum_{l,m \neq c} A_{l,c} A_{m,c} \tilde{C}_{l,k}^{-1}. \quad (56)$$

While for a Rouse polymer the force depends only on the distance along the chain  $|c - n|$ , for a  $\beta$ -polymer, the effective spring coefficient depends on all monomers.

# 1 Extracting the strength of two potential wells for a Rouse polymer

For a Rouse polymer subjected to two gradient forces, the energy  $U_{\text{ext}}(\mathbf{R})$  can now be described by

$$\tilde{\Phi}(\mathbf{R}) = \frac{\kappa}{2} \sum_{j=2}^N (\mathbf{R}_j - \mathbf{R}_{j-1})^2 + \frac{1}{2} k_n (\mathbf{R}_n - \boldsymbol{\mu}_n)^2 + \frac{1}{2} k_m (\mathbf{R}_m - \boldsymbol{\mu}_m)^2. \quad (57)$$

The external potentials represent the interaction of two monomers. We compute here the average position  $\langle \mathbf{R}_c \rangle$  of monomer  $c$ , which is situated between monomers  $n$  and  $m$ . For that goal, we rewrite the potential  $\tilde{\Phi}(\mathbf{R})$  in a quadratic form

$$\tilde{\Phi}(\mathbf{R}) = \frac{1}{2} \sum_{p,q} A_{p,q} \mathbf{R}_p \mathbf{R}_q + \sum_p B_p \mathbf{R}_p + \frac{1}{2} k_n \boldsymbol{\mu}_n^2 + \frac{1}{2} k_m \boldsymbol{\mu}_m^2, \quad (58)$$

where the matrix  $A$  is made of  $d$  blocks, each of size  $N \times N$ , where each block  $i$  is given by

$$A^i = \begin{pmatrix} \kappa & -\kappa & 0 & \cdots & \cdots & \cdots & 0 \\ -\kappa & 2\kappa & -\kappa & \cdots & \vdots & \vdots & 0 \\ \vdots & \vdots & \vdots & \ddots & \vdots & \vdots & \vdots \\ 0 & \cdots & -\kappa & 2\kappa + k_n & -\kappa & 0 & \cdots \\ \vdots & \vdots & \vdots & \ddots & \vdots & \vdots & \vdots \\ \vdots & \vdots & 0 & -\kappa & 2\kappa + k_m & -\kappa & 0 \\ \vdots & \vdots & \vdots & \ddots & \vdots & \vdots & \vdots \\ 0 & 0 & 0 & \cdots & 0 & -\kappa & \kappa \end{pmatrix} \quad (59)$$

and the vector  $\mathbf{B}$  is composed of  $d$  blocks, each given by

$$B^i = \begin{pmatrix} 0 \\ \vdots \\ k_n \boldsymbol{\mu}_n \\ 0 \\ \vdots \\ k_m \boldsymbol{\mu}_m \\ 0 \\ \vdots \end{pmatrix}. \quad (60)$$

Since  $A^i$  is a tridiagonal matrix, we use the algorithm proposed in [34] to calculate its determinant and inverse of matrix. For  $a, b < m$ ,  $A_{a,b}^i$  has the same structure as the matrix 7. Thus

$$\theta_l = \kappa^l \quad \text{for } l < n, \quad (61)$$

$$\theta_n = \kappa^n + k_n \kappa^{n-1}, \quad (62)$$

$$\theta_l = \kappa^{l-1} (\kappa + (l-n+1)k_n), \quad \text{for } n \leq l < m. \quad (63)$$

We next find the series solution at position  $m$ :

$$\theta_m = (2\kappa + k_m)\theta_{m-1} - \kappa^2\theta_{m-2} = \kappa^{m-2} [\kappa^2 + k_n\kappa(m-n+1) + k_m(\kappa + (m-n)k_n)] \quad (64)$$

and

$$\theta_{m+1} = 2\kappa\theta_m - \kappa^2\theta_{m-1} = \kappa^{m-1} [\kappa^2 + k_n\kappa(m-n+2) + 2k_m(\kappa + (m-n)k_n)]. \quad (65)$$

Again, we solve the recurrence relation

$$\begin{aligned} \theta_l &= 2\kappa\theta_{l-1} - \kappa^2\theta_{l-2}, \quad \text{for } m+1 < l < N, \\ \theta_m &= (2\kappa + k_m)\theta_{m-1} - \kappa^2\theta_{m-2} = \kappa^{m-2} [\kappa^2 + k_n\kappa(m-n+1) + k_m(\kappa + (m-n)k_n)], \\ \theta_{m+1} &= 2\kappa\theta_m - \kappa^2\theta_{m-1} = \kappa^{m-1} [\kappa^2 + k_n\kappa(m-n+2) + 2k_m(\kappa + (m-n)k_n)]. \end{aligned} \quad (66)$$

Eq.(66) has the characteristic polynomial (eq.12), thus using the initial conditions (eq.66), we find

$$\theta_l = \kappa^{l-2} (\kappa^2 + \kappa(k_n(l-n+1) + k_m(l-m+1)) + k_n k_m (m-n)(l+1-m)) \quad \text{for } m \leq l < N. \quad (67)$$

Using that

$$\theta_N = \kappa\theta_{N-1} - \kappa^2\theta_{N-2}, \quad (68)$$

we obtain that the determinant is given by

$$\det A^i = \theta_N = \kappa^{N-2} ((k_m + k_n)\kappa + (m-n)k_n k_m). \quad (69)$$

The inverse of the matrix  $A^i$  is given by [34]

$$(A^i)_{ij}^{-1} = \begin{cases} (-1)^{i+j} c_i c_{i+1} \dots c_{j-1} \frac{\theta_{i-1} \phi_{j+1}}{\theta_N}, & i \leq j \\ (-1)^{i+j} a_j a_{j+1} \dots a_{i-1} \frac{\theta_{j-1} \phi_{i+1}}{\theta_N}, & i > j \\ \frac{\theta_{i-1} \phi_{i+1}}{\theta_N} & i = j, \end{cases} \quad (70)$$

where

$$\begin{aligned} \phi_l &= b_l \theta_{l+1} - a_{l+1} c_l \theta_{l+2} \quad \text{for } l \leq N, \\ \phi_{N+1} &= 1, \\ \phi_{N+2} &= 0. \end{aligned} \quad (71)$$

Solving the recurrence relation 71 we find

$$\begin{aligned} \phi_l &= \kappa^{N-l+1} \quad \text{for } m < l < N, \\ \phi_l &= \kappa^{-m-1} [\kappa^{N+m-l+2} + (m-l+1)k_m \kappa^{N+m-l+1}] \quad \text{for } n < l \leq m, \\ \phi_n &= \kappa^{N-n-1} [\kappa^2 + k_m \kappa(m-n+1) + k_n(\kappa + (m-n)k_m)]. \end{aligned} \quad (72)$$

The normalization factor is

$$\begin{aligned} \mathcal{N}^{-1} &= \int_{\Omega} \dots \int_{\Omega} \prod_{i=1}^N d\mathbf{R}_i P(\mathbf{R}) = \int_{\Omega} \dots \int_{\Omega} \prod_{i=1}^N d\mathbf{R}_i \exp\left(-\frac{1}{2} \sum_{p,q} A_{p,q} \mathbf{R}_p \mathbf{R}_q\right. \\ &\quad \left. + \sum_p B_p \mathbf{R}_p + \frac{1}{2} k(\boldsymbol{\mu}_n^2 + \boldsymbol{\mu}_m^2)\right) = \left[\frac{(2\pi)^N}{\prod_i \det A^i}\right]^{3/2} e^{-\frac{1}{2} k(\boldsymbol{\mu}_n^2 + \boldsymbol{\mu}_m^2)} e^{\frac{1}{2} \mathbf{B}^T A^{-1} \mathbf{B}} \end{aligned} \quad (73)$$

Substituting eq.(60) in the exponential term of the last equation, we get

$$\mathbf{B}^T A^{-1} \mathbf{B} = \sum_i (k\mu_n^i)^2 (A^i)_{nn}^{-1} + (k\mu_m^i)^2 (A^i)_{mm}^{-1} + k^2 \mu_n^i \mu_m^i (A^i)_{nm}^{-1} + k^2 \mu_n^i \mu_m^i (A^i)_{mn}^{-1}. \quad (74)$$

We now estimate these elements of  $(A^i)^{-1}$ :

$$\begin{aligned} (A^i)_{nn}^{-1} &= \frac{\theta_{n-1} \phi_{n+1}}{\theta_N} = \frac{\kappa + k_m(m-n)}{k_n k_m(m-n) + (k_n + k_m)\kappa}, \\ (A^i)_{mm}^{-1} &= \frac{\theta_{m-1} \phi_{m+1}}{\theta_N} = \frac{\kappa + k_n(m-n)}{k_n k_m(m-n) + (k_n + k_m)\kappa}, \\ (A^i)_{nm}^{-1} &= (-1)^{n+m} (-\kappa)^{m-n} \frac{\theta_{n-1} \phi_{m+1}}{\theta_N} = \frac{\kappa}{k_n k_m(m-n) + (k_n + k_m)\kappa} \end{aligned} \quad (75)$$

Finally, we compute the average position of monomer  $c$

$$\begin{aligned} \langle \mathbf{R}_c \rangle &= \int_{\Omega} \dots \int_{\Omega} \prod_{i=1}^N d\mathbf{R}_i \mathbf{R}_c P(\mathbf{R}) = \mathcal{N} \int_{\Omega} \dots \int_{\Omega} \prod_{i=1}^N d\mathbf{R}_i \mathbf{R}_c \exp\left(-\frac{1}{2} \sum_{p,q} A_{p,q} \mathbf{R}_p \mathbf{R}_q\right. \\ &\quad \left. + \sum_p B_p \mathbf{R}_p + \frac{1}{2} k_n \boldsymbol{\mu}_n^2 + \frac{1}{2} k_m \boldsymbol{\mu}_m^2\right) = \sum_i k_n \mu_n^i (A^i)_{cn}^{-1} + k_m \mu_m^i (A^i)_{cm}^{-1}, \end{aligned} \quad (76)$$

where

$$\begin{aligned} (A^i)_{cn}^{-1} &= (-1)^{c+n} (-\kappa)^{c-n} \frac{\theta_{n-1} \phi_{c+1}}{\theta_N} = \frac{\kappa + (m-c)k_m}{k_n k_m(m-n) + (k_n + k_m)\kappa}, \\ (A^i)_{cm}^{-1} &= (-1)^{c+m} (-\kappa)^{m-c} \frac{\theta_{c-1} \phi_{m+1}}{\theta_N} = \frac{\kappa + (c-n)k_n}{k_n k_m(m-n) + (k_n + k_m)\kappa} \end{aligned} \quad (77)$$

Thus

$$\langle \mathbf{R}_c \rangle = \frac{1}{k_n k_m(m-n) + (k_n + k_m)\kappa} \sum_i \mu_n^i k_n (\kappa + (m-c)k_m) + \mu_m^i k_m (\kappa + (c-n)k_n). \quad (78)$$

We now estimate the conditional expectation of the velocity for the observed monomer  $c$ , in the small time step regime

$$\lim_{\Delta t \rightarrow 0} \mathbb{E}\left\{ \frac{\mathbf{R}_c(t + \Delta t) - \mathbf{R}_c(t)}{\Delta t} \middle| \mathbf{R}_c = \mathbf{x} \right\}. \quad (79)$$

The conditional expectation of the velocity of monomer  $c$  is

$$\begin{aligned}
& \lim_{\Delta t \rightarrow 0} \mathbb{E} \left\{ \frac{\mathbf{R}_c(t + \Delta t) - \mathbf{R}_c(t)}{\Delta t} \middle| \mathbf{R}_c = \mathbf{x} \right\} = D \int \left[ -\nabla_{\mathbf{R}_c} \tilde{\Phi}(\mathbf{R}) \right]_{\mathbf{R}_c = \mathbf{x}} P(\mathbf{R} | \mathbf{R}_c = \mathbf{x}) \prod_i d\mathbf{R}_i \\
& = D \int (\kappa(\mathbf{x} - \mathbf{R}_{c-1}) - \kappa(\mathbf{R}_{c+1} - \mathbf{x})) P(\mathbf{R} | \mathbf{R}_c = \mathbf{x}) \prod_i d\mathbf{R}_i = -\tilde{\mathcal{N}} D e^{-\kappa \mathbf{x}^2 - \frac{1}{2} k_n \mu_n^2 - \frac{1}{2} k_m \mu_m^2} \\
& \quad \int (\kappa(\mathbf{x} - \mathbf{R}_{c-1}) - \kappa(\mathbf{R}_{c+1} - \mathbf{x})) e^{-\frac{1}{2} \sum_{i,p,q} \tilde{A}_{p,q}^i R_p R_q + \sum_{i,p} \tilde{B}_p^i R_p} \prod_{i \neq c} d\mathbf{R}_i \\
& = -D \kappa \sum_i \left( 2x^i - \sum_l \tilde{B}_l^i \left( (\tilde{A}^i)_{c-1,l}^{-1} + (\tilde{A}^i)_{c+1,l}^{-1} \right) \right), \tag{80}
\end{aligned}$$

where  $\tilde{\mathcal{N}}$  is the normalization as computed in 73 when the  $c$  column is removed.  $\tilde{A}^i$  is a block matrix of size  $(N-1) \times (N-1)$

$$\tilde{A}^i = \begin{pmatrix} \tilde{A}_1^i & 0 \\ 0 & \tilde{A}_2^i \end{pmatrix} \tag{81}$$

with

$$\tilde{A}_1^i = \begin{pmatrix} \kappa & -\kappa & 0 & \cdots & 0 & 0 \\ -\kappa & 2\kappa & -\kappa & \cdots & 0 & 0 \\ \vdots & \vdots & \vdots & \ddots & \vdots & \vdots \\ \vdots & 0 & -\kappa & 2\kappa + k_n & -\kappa & \vdots \\ \vdots & \vdots & \vdots & \ddots & \vdots & \vdots \\ \vdots & 0 & 0 & -\kappa & 2\kappa & -\kappa \\ \vdots & 0 & 0 & 0 & -\kappa & 2\kappa \end{pmatrix} \tag{82}$$

which is of size  $(c-1) \times (c-1)$  and

$$\tilde{A}_2^i = \begin{pmatrix} 2\kappa & -\kappa & 0 & \cdots & 0 & 0 \\ -\kappa & 2\kappa & -\kappa & \cdots & 0 & 0 \\ \vdots & \vdots & \vdots & \ddots & \vdots & \vdots \\ \vdots & 0 & -\kappa & 2\kappa + k_m & -\kappa & \vdots \\ \vdots & \vdots & \vdots & \ddots & \vdots & \vdots \\ \vdots & 0 & 0 & -\kappa & 2\kappa & -\kappa \\ \vdots & 0 & 0 & 0 & -\kappa & \kappa \end{pmatrix} \tag{83}$$

which is of size  $(N - c) \times (N - c)$ . The vector  $\tilde{\mathbf{B}}$  is composed of  $d$  blocks, each given by

$$\tilde{B}^i = \begin{pmatrix} 0 \\ \vdots \\ k_n \mu_n \\ \vdots \\ \kappa x^i \\ \kappa x^i \\ \vdots \\ k_m \mu_m \\ \vdots \end{pmatrix}. \quad (84)$$

To find the determinant  $\det \tilde{A}_1^i$ , we use eq.(63):

$$\det \tilde{A}_1^i = \kappa^{c-2} (\kappa + (c - n)k_n) \quad (85)$$

and using eq.(72)

$$\det \tilde{A}_2^i = \kappa^{N-c-1} (\kappa + (m - c)k_m). \quad (86)$$

The elements of the inverse matrix are given by

$$\begin{aligned} (\tilde{A}_1^i)^{-1}_{c-1,c-1} &= \frac{\kappa + (c - n - 1)k_n}{\kappa^2 + (c - n)k_n \kappa} = \frac{1}{\kappa} - \frac{k_n}{\kappa(\kappa + (c - n)k_n)}, \\ (\tilde{A}_2^i)^{-1}_{c+1,c+1} &= \frac{\kappa + (m - c - 1)k_m}{\kappa^2 + (m - c)k_m \kappa} = \frac{1}{\kappa} - \frac{k_m}{\kappa(\kappa + (m - c)k_m)}, \\ (\tilde{A}_1^i)^{-1}_{c-1,n} &= (-1)^{c+n-1} (-\kappa)^{c-n-1} \frac{\theta_{n-1}}{\theta_{c-1}} = \frac{1}{\kappa + (c - n)k_n}, \\ (\tilde{A}_2^i)^{-1}_{c+1,m} &= \frac{1}{\kappa + (m - c)k_m}. \end{aligned} \quad (87)$$

Now, we estimate the term in the parenthesis in eq.(80) by substituting eqs.(87)

$$\begin{aligned} K^i &= 2x^i - \sum_l \tilde{B}_l^i \left( (\tilde{A}^i)^{-1}_{c-1,l} + (\tilde{A}^i)^{-1}_{c+1,l} \right) \\ &= 2x^i - \left( \kappa x^i (\tilde{A}_1^i)^{-1}_{c-1,c-1} + \kappa x^i (\tilde{A}_1^i)^{-1}_{c+1,c+1} + k_n \mu_n (\tilde{A}_1^i)^{-1}_{c-1,n} + k_m \mu_m (\tilde{A}_2^i)^{-1}_{c+1,n} \right) \\ &= 2x^i - \kappa x^i \left( \frac{\kappa + (c - n - 1)k_n}{\kappa^2 + (c - n)k_n \kappa} + \frac{\kappa + (m - c - 1)k_m}{\kappa^2 + (m - c)k_m \kappa} \right) - \frac{k_n \mu_n^i}{\kappa + (c - n)k_n} - \frac{k_m \mu_m^i}{\kappa + (m - c)k_m} \\ &= 2x^i - x^i \left( \frac{\kappa + (c - n - 1)k_n}{\kappa + (c - n)k_n} + \frac{\kappa + (m - c - 1)k_m}{\kappa + (m - c)k_m} \right) - \frac{k_n \mu_n^i}{\kappa + (c - n)k_n} - \frac{k_m \mu_m^i}{\kappa + (m - c)k_m} \\ &= 2x^i - x^i \left( 2 - \frac{k_n}{\kappa + (c - n)k_n} - \frac{k_m}{\kappa + (m - c)k_m} \right) - \frac{k_n \mu_n^i}{\kappa + (c - n)k_n} - \frac{k_m \mu_m^i}{\kappa + (m - c)k_m} \\ &= x^i \left( \frac{k_n}{\kappa + (c - n)k_n} + \frac{k_m}{\kappa + (m - c)k_m} \right) - \frac{k_n \mu_n^i}{\kappa + (c - n)k_n} - \frac{k_m \mu_m^i}{\kappa + (m - c)k_m} \end{aligned} \quad (88)$$

We introduce into expression eq.(88) the position of monomer  $c$  with respect to its mean position ( $\tilde{\mathbf{x}} = \mathbf{x} - \langle \mathbf{R}_c \rangle$ ) (eq.78)

$$\begin{aligned}
K^i &= \left[ \tilde{x}^i + \frac{1}{k_n k_m (m-n) + (k_n + k_m) \kappa} \sum_i \mu_n^i k_n (\kappa + (m-c)k_m) + \mu_m^i k_m (\kappa + (c-n)k_n) \right] \\
&\quad \left( \frac{k_n}{\kappa + (c-n)k_n} + \frac{k_m}{\kappa + (m-c)k_m} \right) - \frac{k_n \mu_n^i}{\kappa + (c-n)k_n} - \frac{k_m \mu_m^i}{\kappa + (m-c)k_m} \\
&= \tilde{x}^i \left( \frac{k_n}{\kappa + (c-n)k_n} + \frac{k_m}{\kappa + (m-c)k_m} \right). \tag{89}
\end{aligned}$$

Finally, substituting eq.(89) into expression (80), we find

$$\lim_{\Delta t \rightarrow 0} \mathbb{E} \left\{ \frac{\mathbf{R}_c(t + \Delta t) - \mathbf{R}_c(t)}{\Delta t} \middle| \tilde{\mathbf{x}} \right\} = -D(k_{c,n} + k_{c,m}) \tilde{\mathbf{x}}, \tag{90}$$

where

$$k_{c,n} = \frac{k_n \kappa}{\kappa + (c-n)k_n} \tag{91}$$

and

$$k_{c,m} = \frac{k_m \kappa}{\kappa + (m-c)k_m}. \tag{92}$$

### 1.1 Variance of monomer $c$ position

We now find the variance of a monomer position  $\langle \mathbf{R}_c^2 \rangle$  with respect to its average position

$$\langle (\mathbf{R}_c - \langle \mathbf{R}_c \rangle)^2 \rangle = \langle \mathbf{R}_c^2 \rangle - \langle \mathbf{R}_c \rangle^2, \tag{93}$$

We begin by calculating

$$\begin{aligned}
\langle \mathbf{R}_c^2 \rangle &= \int_{\Omega} \dots \int_{\Omega} d\mathbf{R}_1 d\mathbf{R}_2 \dots d\mathbf{R}_N \mathbf{R}_c^2 P(\mathbf{R}) = \mathcal{N} \left[ \frac{(2\pi)^{d(N-1)}}{\det A} \right]^{1/2} \sum_i \frac{\partial^2}{\partial (R_c^i)^2} \exp \left( \frac{1}{2} \sum_i \sum_{pq} A_{pq}^{i-1} \right) \\
&= \sum_i (A^i)_{cc}^{-1} + ((A^i)_{cn}^{-1} k_n \mu_n^i + (A^i)_{cm}^{-1} k_m \mu_m^i)^2, \tag{94}
\end{aligned}$$

where

$$(A^i)_{cc}^{-1} = \frac{\theta_{c-1} \phi_{c+1}}{\theta_N} = \frac{(\kappa + (c-n)k_n)(\kappa + (m-c)k_m)}{(k_m + k_n)\kappa^2 + (m-n)k_n k_m \kappa}. \tag{95}$$

Substituting (94), (95) and (78) into eq.(93) we find

$$\langle (\mathbf{R}_c - \langle \mathbf{R}_c \rangle)^2 \rangle = \frac{1}{k_{cn} + k_{cm}}. \tag{96}$$

## 1.2 Two potential wells located on the left side of the observed locus ( $n < m < c$ )

Finally, we solve for the case  $n < m < c$ . We begin with the average position of monomer  $c$

$$\langle \mathbf{R}_c \rangle = \sum_i k_n \mu_n^i (A^i)_{cn}^{-1} + k_m \mu_m^i (A^i)_{cm}^{-1}, \quad (97)$$

where  $A^i$  is given in eq.(59). Thus

$$\begin{aligned} (A^i)_{cn}^{-1} &= (-1)^{c+n} (-\kappa)^{c-n} \frac{\theta_{n-1} \phi_{c+1}}{\theta_N} = \frac{\kappa}{k_n k_m (m-n) + \kappa (k_n + k_m)}, \\ (A^i)_{cm}^{-1} &= (-1)^{c+m} (-\kappa)^{m-c} \frac{\theta_{m-1} \phi_{c+1}}{\theta_N} = \frac{\kappa + (m-n)k_n}{k_n k_m (m-n) + \kappa (k_n + k_m)}. \end{aligned} \quad (98)$$

The average position of  $c$  is

$$\langle \mathbf{R}_c \rangle = \frac{1}{k_n k_m (m-n) + \kappa (k_n + k_m)} \sum_i k_n \mu_n^i \kappa + k_m \mu_m^i (\kappa + (m-n)k_n). \quad (99)$$

The conditional expectation of the velocity of monomer  $c$  for a small time step is defined as

$$\begin{aligned} \lim_{\Delta t \rightarrow 0} \mathbb{E} \left\{ \frac{\mathbf{R}_c(t + \Delta t) - \mathbf{R}_c(t)}{\Delta t} \middle| \mathbf{x} \right\} &= D \int \left[ -\nabla_{\mathbf{R}_c} \tilde{\Phi}(\mathbf{R}) \right]_{\mathbf{R}_c = \mathbf{x}} P(\mathbf{R} | \mathbf{R}_c = \mathbf{x}) \prod_i d\mathbf{R}_i \\ &= -D\kappa \sum_i \left( 2x^i - \sum_l V_l^i \left( (U^i)_{c-1,l}^{-1} + (U^i)_{c+1,l}^{-1} \right) \right), \end{aligned} \quad (100)$$

where  $U^i$  is also a block matrix of size  $N-1 \times N-1$

$$U^i = \begin{pmatrix} U_1^i & 0 \\ 0 & U_2^i \end{pmatrix} \quad (101)$$

with

$$U_1^i = \begin{pmatrix} \kappa & -\kappa & 0 & \cdots & 0 & 0 & 0 \\ -\kappa & 2\kappa & -\kappa & \cdots & 0 & 0 & 0 \\ \vdots & \vdots & \vdots & \ddots & \vdots & \vdots & \vdots \\ \vdots & 0 & -\kappa & 2\kappa + k_n & -\kappa & 0 & \vdots \\ \vdots & \vdots & \vdots & \ddots & \vdots & \vdots & \vdots \\ \vdots & 0 & 0 & -\kappa & 2\kappa + k_m & -\kappa & \vdots \\ \vdots & \vdots & \vdots & \ddots & \vdots & \vdots & \vdots \\ \vdots & 0 & 0 & 0 & -\kappa & 2\kappa & -\kappa \\ \vdots & 0 & 0 & 0 & 0 & -\kappa & 2\kappa \end{pmatrix} \quad (102)$$



which is of size  $(c-1) \times (c-1)$  and

$$U_2^i = \begin{pmatrix} 2\kappa & -\kappa & 0 & \cdots & 0 & 0 \\ -\kappa & 2\kappa & -\kappa & \cdots & 0 & 0 \\ \vdots & \vdots & \vdots & \ddots & \vdots & \vdots \\ \vdots & 0 & 0 & -\kappa & 2\kappa & -\kappa \\ \vdots & 0 & 0 & 0 & -\kappa & \kappa \end{pmatrix} \quad (103)$$

which is of size  $(N-c) \times (N-c)$ . The vector  $\mathbf{V}$  is composed of  $d$  blocks, each given by

$$V^i = \begin{pmatrix} 0 \\ \vdots \\ k_n \mu_n \\ \vdots \\ k_m \mu_m \\ \vdots \\ \kappa x^i \\ \kappa x^i \\ \vdots \end{pmatrix}. \quad (104)$$

To find the determinant  $\det \tilde{U}_1^i$ , we use eq.(67):

$$\det U_1^i = \theta_{c-1} = \kappa^{c-3} (\kappa^2 + ((c-n)k_n + (c-m)k_m)\kappa + (m-n)(c-m)k_n k_m) \quad (105)$$

and using eq.(61), we get

$$\det U_2^i = \kappa^{N-c}. \quad (106)$$

The  $(c-1, c-1)$  term of the inverse matrix is given by

$$\begin{aligned} (U^i)_{c-1, c-1}^{-1} &= \frac{\theta_{c-2} \phi_{c+1}}{\det(U_2^i) \det(U_1^i)} \\ &= \frac{\kappa^2 + ((c-n-1)k_n + (c-m-1)k_m)\kappa + (m-n)(c-m-1)k_n k_m}{\kappa (\kappa^2 + ((c-n)k_n + (c-m)k_m)\kappa + (m-n)(c-m)k_n k_m)} \\ &= \frac{1}{\kappa} - \frac{\kappa(k_n + k_m) + (m-n)k_n k_m}{\kappa (\kappa^2 + ((c-n)k_n + (c-m)k_m)\kappa + (m-n)(c-m)k_n k_m)} \quad (107) \end{aligned}$$

where we used eqs.(72),(67). For simplicity we name the indices of the matrix  $U$  ( $i = 1, 2, \dots, c-1, c+1, \dots, N$ )

$$(U^i)_{c+1, c+1}^{-1} = \frac{\theta_{c-1} \phi_{c+2}}{\det(U_2^i) \det(U_1^i)} = \frac{1}{\kappa}, \quad (108)$$

$$\begin{aligned}
(U^i)_{c-1,n}^{-1} &= \frac{(-1)^{c+n-1}(-\kappa)^{c-n-1}\theta_{n-1}}{\det(U_1^i)} \\
&= \frac{\kappa}{\kappa^2 + ((c-n)k_n + (c-m)k_m)\kappa + (m-n)(c-m)k_n k_m} \quad (109)
\end{aligned}$$

and

$$\begin{aligned}
(U^i)_{c-1,m}^{-1} &= \frac{(-1)^{c+m-1}(-\kappa)^{c-m-1}\theta_{m-1}}{\det(U_1^i)} \\
&= \frac{\kappa + (m-n)k_n}{\kappa^2 + ((c-n)k_n + (c-m)k_m)\kappa + (m-n)(c-m)k_n k_m} \quad (110)
\end{aligned}$$

We estimate the term in the parenthesis in eq.(100) by substituting eqs.(107)-(110)

$$\begin{aligned}
J^i &= 2x^i - \sum_l V_l^i \left( (U^i)_{c-1,l}^{-1} + (U^i)_{c+1,l}^{-1} \right) \\
&= 2x^i - \left( \kappa x^i (U^i)_{c-1,c-1}^{-1} + \kappa x^i (U^i)_{c+1,c+1}^{-1} + k_n \mu_n (U^i)_{c-1,n}^{-1} + k_m \mu_m (U^i)_{c+1,n}^{-1} \right) \\
&= 2x^i - \kappa x^i \left( \frac{2}{\kappa} - \frac{(k_n + k_m)\kappa + (m-n)k_n k_m}{\kappa(\kappa^2 + ((c-n)k_n + (c-m)k_m)\kappa + (m-n)(c-m)k_n k_m)} \right) \\
&\quad - \frac{\kappa k_n \mu_n^i + (\kappa + (m-n)k_n)k_m \mu_m^i}{\kappa^2 + ((c-n)k_n + (c-m)k_m)\kappa + (m-n)(c-m)k_n k_m} \\
&= x^i \left( \frac{(k_n + k_m)\kappa + (m-n)k_n k_m}{\kappa^2 + ((c-n)k_n + (c-m)k_m)\kappa + (m-n)(c-m)k_n k_m} \right) \\
&\quad - \frac{\kappa k_n \mu_n^i + (\kappa + (m-n)k_n)k_m \mu_m^i}{\kappa^2 + ((c-n)k_n + (c-m)k_m)\kappa + (m-n)(c-m)k_n k_m}. \quad (111)
\end{aligned}$$

We introduce into expression eq.(111) the position of monomer  $c$  with respect to its mean position ( $\tilde{\mathbf{x}} = \mathbf{x} - \langle R_c \rangle$ ) (eq.99)

$$\begin{aligned}
J^i &= \left[ \tilde{x}^i + \frac{1}{k(m-n) + 2\kappa} \sum_i \mu_n^i \kappa + \mu_m^i (\kappa + (m-n)k) \right] \\
&\quad \times \left( \frac{(k_n + k_m)\kappa + (m-n)k_n k_m}{\kappa^2 + ((c-n)k_n + (c-m)k_m)\kappa + (m-n)(c-m)k_n k_m} \right) \\
&\quad - \frac{\kappa k_n \mu_n^i + (\kappa + (m-n)k_n)k_m \mu_m^i}{\kappa^2 + ((c-n)k_n + (c-m)k_m)\kappa + (m-n)(c-m)k_n k_m} \\
&= \tilde{x}^i \frac{(k_n + k_m)\kappa + (m-n)k_n k_m}{\kappa^2 + ((c-n)k_n + (c-m)k_m)\kappa + (m-n)(c-m)k_n k_m}. \quad (112)
\end{aligned}$$

Finally, substituting eq.(112) into expression (100) we find

$$\lim_{\Delta t \rightarrow 0} \mathbb{E} \left\{ \frac{\mathbf{R}_c(t + \Delta t) - \mathbf{R}_c(t)}{\Delta t} \middle| \tilde{\mathbf{x}} \right\} = -D k_{c,nm} \tilde{\mathbf{x}}, \quad (113)$$

where

$$k_{c,nm} = \kappa \frac{\kappa(k_n + k_m) + (m-n)k_n k_m}{\kappa^2 + ((c-n)k_n + (c-m)k_m)\kappa + (m-n)(c-m)k_n k_m}. \quad (114)$$

## 2 Computing the auto-correlation function of the tagged locus when a force is applied

We now study the effect of the potential well on the second moment of the locus dynamics by calculating its auto-correlation function. The external potential can be written in term of the modes  $\mathbf{u}_p$

$$U_{\text{ext}}(\mathbf{R}_n) = \frac{1}{2}k(\boldsymbol{\mu} - \mathbf{R}_n)^2 = \frac{1}{2}k\left(\boldsymbol{\mu} - \sum_{p=0}^{N-1}\alpha_p^n\mathbf{u}_p\right)^2, \quad (115)$$

where we used the orthogonal transformation which diagonalize the Rouse potential [21]

$$\alpha_p^c = \begin{cases} \sqrt{\frac{1}{N}}, & p = 0 \\ \sqrt{\frac{2}{N}}\cos\left((c-1/2)\frac{p\pi}{N}\right), & \text{otherwise.} \end{cases} \quad (116)$$

In the presence of the potential, the Langevin equations for the modes are

$$\frac{d\mathbf{u}_p}{dt} = D(k\alpha_p^n\boldsymbol{\mu} - ((\alpha_p^n)^2k + \tilde{\kappa}_p)\mathbf{u}_p) - Dk\alpha_p^n\sum_{q=0, q\neq p}^{N-1}\alpha_q^n\mathbf{u}_q + \sqrt{2D}\frac{d\tilde{\mathbf{w}}_p}{dt}, \quad (117)$$

with  $\tilde{\kappa}_p = 4\kappa\sin\left(\frac{p\pi}{2N}\right)^\beta$  ( $\beta > 1$ ) [24]. Thus, the potential on monomer  $n$  couples the dynamical equations for the modes. When the strength of the coupling term is relatively weak  $(\alpha_p^n)^2k \ll \tilde{\kappa}_p$ , we can neglect the coupling term. This will be the case for the higher modes given that  $k < \kappa$  and  $N$  large. In this case, the Langevin equations 117 can be approximated by

$$\begin{aligned} \frac{d\mathbf{u}_p}{dt} &= D(k\alpha_p^n\boldsymbol{\mu} - ((\alpha_p^n)^2k + \tilde{\kappa}_p)\mathbf{u}_p) + \sqrt{2D}\frac{d\tilde{\mathbf{w}}_p}{dt}, \\ \frac{d\mathbf{u}_0}{dt} &= D_{\text{cm}}\alpha_0^n(\boldsymbol{\mu} - \alpha_0^n\mathbf{u}_0) + \sqrt{2D_{\text{cm}}}\frac{d\tilde{\mathbf{w}}_0}{dt}. \end{aligned} \quad (118)$$

We denote  $b_p = (\alpha_p^n)^2k + \tilde{\kappa}_p$ . The solutions of the eqs.(118) is

$$\mathbf{u}_p(t) = \mathbf{u}_p(0)e^{-Db_pt} + \frac{k\alpha_p^n\boldsymbol{\mu}}{b_p}(1 - e^{-Db_pt}) + \sqrt{2D_p}\int_0^t e^{Db_p(s-t)}d\tilde{\mathbf{w}}_p(s), \quad (119)$$

while the expectation values are

$$\begin{aligned} \langle \mathbf{u}_p(t) \rangle &= \mathbf{u}_p(0)e^{-Db_pt} + \frac{k\alpha_p^n\boldsymbol{\mu}}{b_p}(1 - e^{-Db_pt}), \\ \langle \mathbf{u}_0(t) \rangle &= \mathbf{u}_0(0)e^{-D_{\text{cm}}k(\alpha_0^n)^2t} + \frac{\boldsymbol{\mu}}{\alpha_0^n}(1 - e^{-D_{\text{cm}}k\alpha_0^n t}). \end{aligned} \quad (120)$$

The time auto-correlation function of mode  $p$  in the spatial direction  $i$  is [26]

$$\begin{aligned} \langle [u_p^i(t_1) - \langle u_p^i(t_1) \rangle] [u_p^i(t_2) - \langle u_p^i(t_2) \rangle] \rangle &= 2D\left\langle \int_0^{t_1} e^{Db_p(s_1-t_1)}d\omega_p^i(s_1) \int_0^{t_2} e^{Db_p(s_2-t_2)}d\omega_p^i(s_2) \right\rangle \\ &= \frac{1}{b_p}\left(e^{-Db_p(t_2-t_1)} - e^{-Db_p(t_1+t_2)}\right) \approx \frac{1}{(\alpha_p^n)^2k + \tilde{\kappa}_p}e^{-D((\alpha_p^n)^2k + \tilde{\kappa}_p)(t_2-t_1)}, \end{aligned} \quad (121)$$

for  $t_2 > t_1$ , where we approximated for long times and introduced back the expression for  $b_p$ . Similarly, for the center of mass we have

$$\langle [u_0^i(t_1) - \langle u_0^i(t_1) \rangle] [u_0^i(t_2) - \langle u_0^i(t_2) \rangle] \rangle \approx \frac{1}{(\alpha_0^n)^2 k} e^{-D_{\text{cm}}(\alpha_0^n)^2 k(t_2-t_1)}. \quad (122)$$

Thus, the auto-correlation function of monomer  $c$  is

$$\begin{aligned} \langle [\mathbf{R}_c(t_1) - \langle \mathbf{R}_c(t_1) \rangle] [\mathbf{R}_c(t_2) - \langle \mathbf{R}_c(t_2) \rangle] \rangle &= \frac{d}{k} e^{-D(\alpha_0^n)^2 k(t_2-t_1)} \\ &+ \sum_{p=1}^{N-1} \frac{d(\alpha_p^c)^2}{(\alpha_p^n)^2 k + \tilde{\kappa}_p} e^{-D((\alpha_p^n)^2 k + \tilde{\kappa}_p)(t_2-t_1)}, \end{aligned} \quad (123)$$

where  $(\alpha_0^n)^2 = \frac{1}{N}$ .

## References

- [1] R. Metzler and J. Klafter, Phys. Rep. **339**, 1 (2000).
- [2] E. Kepten, I. Bronshtein and Y. Garini, Phys. Rev. E **83**, 041919 (2011).
- [3] H. Wong, H. Marie-Nelly, S. Herbert, P. Carrivain, H. Blanc, R. Koszul, E. Fabre and C. Zimmer, Curr. Biol. **22**, 1881-1890 (2012).
- [4] N. Tokuda, T. P. Terada and M. Sasai, Biophys J **102**, 296-304 (2012).
- [5] I. M. Sokolov, Phys. Rev. Lett. **90**, 080601 (2003).
- [6] Y. Kantor and M. Kardar, Phys. Rev. E **76**, 061121 (2007).
- [7] S. E. Lee, J. K. Moore, A. Holmes, K. Umezū, R. D. Kolodner, J. E. Haber, Cell **94**, 399-409 (1998).
- [8] P. Meister, L. R. Gehlen, E. Varela, V. Kalck and S. M. Gasser, Methods Enzymol. **470**, 535-567 (2010).
- [9] C. Zimmer and E. Fabre, J. Cell Biol. **192**, 723-733 (2011).
- [10] G. Fudenberg and L. A. Mirny, Curr Opin Genet Dev. **22**, 115-24 (2012).
- [11] J. Dekker, M. A. Marti-Renom, L. A. Mirny, Nat Rev Genet. **14**, 390-403 (2013).
- [12] V. Dion, V. Klack, C. Horigome, B. D. Towbin and S. M. Gasser, Nat. Cell Biol. **14**, 502-509 (2012).
- [13] J. Mine-Hattab and R. Rothstein, Nat. Cell Biol. **14**, 510-517 (2012).
- [14] S. C. Weber, M. A. Thompson, W. Moerner, A. J. Spakowitz and J. A. Theriot, Biophys. J. **102**, 2443 (2013).

- [15] G. Hummer and A. Szabo, Free energy profiles from single-molecule pulling experiments. *Proc Natl Acad Sci U S A*, **107**, 21441-6 (2010).
- [16] G. Hummer and A. Szabo, Kinetics from nonequilibrium single-molecule pulling experiments. *Biophys J.*, **85**, 5-15 (2003).
- [17] M. Maghrebi, Y. Kantor and M. Kardar, *Europhys. Lett.* **96**, 66002 (2011).
- [18] M. F. Maghrebi, Y. Kantor and M. Kardar, *Phys. Rev E* **86**, 061801 (2012).
- [19] S. Nagai, K. Dubrana, M. Tsai-Pflugfelder, M. B. Davidson, T. M. Roberts, G. W. Brown, E. Varela, F. Hediger, S. M. Gasser and N. J. Krogan, *Science* **322**, 597-602 (2008).
- [20] J. S. Verdaasdonk, P. A. Vasquez, R. M. Barry, T. Barry, S. Goodwin, M. G. Forest and K. Bloom, *Mol. Cell* **52**, 819831 (2014).
- [21] M. Doi and S. F. Edwards, *The Theory of Polymer Dynamics* (Clarendon Press, Oxford, 1986).
- [22] B. Albert, J. Mathon, A. Shukla, H. Saad, C. Normand, I. Lger-Silvestre, D. Villa, A. Kamgoue, J. Mozziconacci, H. Wong, C. Zimmer, P. Bhargava, A. Bancaud and O. Gadal, *J Cell Biol.* **202**, 201-210 (2013).
- [23] A. Amitai and D. Holcman, *Phys. Rev. Lett.* **110**, 248105 (2013).
- [24] A. Amitai and D. Holcman, *Phys. Rev E* **88**, 052604 (2013).
- [25] A. Taddei, F. Hediger, F. R. Neumann, C. Bauer and S. M. Gasser, *EMBO J* **23**, 1301-12 (2004).
- [26] Z. Schuss, *Diffusion and Stochastic Processes. An Analytical Approach*, (Springer-Verlag, New York, NY, 2009).
- [27] M. Lindner, G. Nir, A. Vivante, I. T. Young, Y. Garini, *Phys. Rev. E* **87**, 022716 (2013).
- [28] N. Hoze, D. Nair, E. Hosy, C. Sieben, S. Manley, A. Herrmann, JB. Sibarita, D. Choquet and D. Holcman, *Proc Natl Acad Sci U S A* **109**, 17052-17057 (2012).
- [29] W. Marshall, A. Straight, J. Marko, J. Swedlow, A. Dernburg, A. Belmont, A. Murray, D. Agard and J. Sedat, *Curr Biol.* **7**, 930 (1997).
- [30] J. Jeon and R. Metzler, *Phys. Rev. E* **81**, 021103 (2010).
- [31] A. Javer, Z. Long, E. Nugent, M. Grisi, K. Siriawatwetchakul, K. D. Dorfman, P. Cicuta and M. C. Lagomarsino, *Nat. comm.* **4**, 3003 (2013).
- [32] C. A. Schneider, W. S. Rasband and K. W. Eliceiri, *Nat. Methods* **9**, 671-675 (2012).

- [33] I. F. Sbalzarini and P. Koumoutsakos, *J Struct Biol.* **151**, 182-195 (2005).
- [34] R. A. Usmani, *Comput. Math. Appl.* **27**, 59-66 (1994).
